# Supplementary material for: Resonant tunneling in a colloidal CdS semiconductor quantum-dot single-electron transistor based on heteroepitaxial-spherical Au/Pt nanogap electrodes
Source: Royal Society of Chemistry journal article supplement (doi:10.1039/d4na00288a), 2024-01-01
Supplement: d4na00288a1.pdf [file d4na00288a1.pdf]

## Supplementary information

### **Resonant tunneling on a colloidal CdS semiconductor quantum-dot single-electron transistor based on heteroepitaxial-spherical Au/Pt nanogap electrodes**

Genki Ohkatsu,<sup>a</sup> Takumi Nishinobo,<sup>a</sup> Masaki Saruyama,<sup>b</sup> Toshiharu Teranishi<sup>b</sup> and Yutaka Majima<sup>\*a</sup>

<sup>a</sup>Laboratory for Materials and Structures, Institute of Innovative Research,  
Tokyo Institute of Technology, Yokohama 226-8503, Japan

<sup>b</sup>Institute for Chemical Research, Kyoto University, Uji 611-0011, Japan

\*E-mail: majima@mssl.titech.ac.jp

## Theoretical $I_{\text{SET}}-V_d$ curves based on the orthodox theory of SET

Figures S1(a)-S1(e) show theoretical  $I_{\text{SET}}-V_d$  curves based on the orthodox theory of SET. Each SET parameter was varied  $\pm 5\%$  from the optimized values:  $R_s = 280 \text{ M}\Omega$ ,  $R_d = 50 \text{ M}\Omega$ ,  $C_s = 200 \text{ zF}$ ,  $C_d = 300 \text{ zF}$ , and  $Q_0 = 0.015 e$ , respectively.

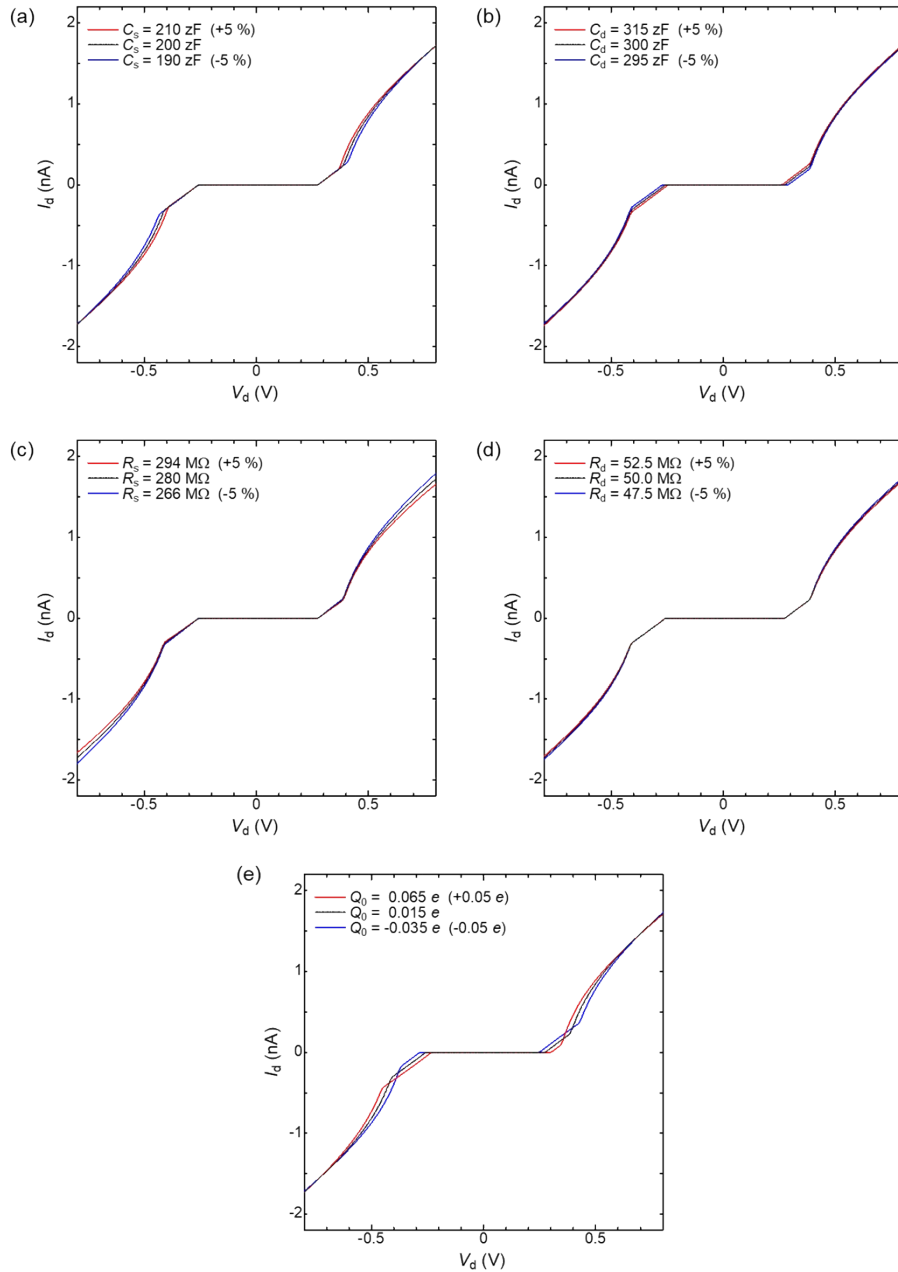

**Figure S1.** Comparison of theoretical  $I_{\text{SET}}-V_d$  curves where one of the 5 parameters is varied by  $\pm 5\%$  in (a)  $R_s$ , (b)  $R_d$ , (c)  $C_s$ , (d)  $C_d$ , and (e)  $Q_0$ , respectively.

## Theoretical Resonant Tunneling Current $I_{RT} - V_d$ Curve on a single Quantum Dot Device

The resonant tunneling current  $I_{RT}$  is calculated by

$$I_{RT} = A \int_0^{V_d} \frac{1}{\sqrt{2\pi}\sigma} \exp\left\{-\frac{(eV - \mu_{QD} - e\Delta V_{QD})^2}{2\sigma^2}\right\} dV. \#(S1)$$

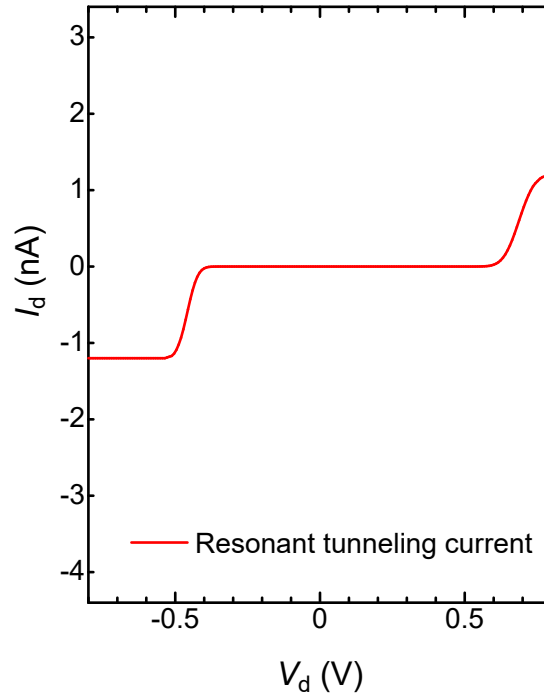

**Figure S2.** Theoretical resonant tunneling current  $I_{RT} - V_d$  curve. Here, the fitting parameters are  $\mu_{dot} = 0.275$  eV,  $\sigma = 0.017$  eV, and  $A = 1.2 \times 10^{-9}$  A.
